# Supplementary material for: HDC1 Promotes Primary Root Elongation by Regulating Auxin and K+ Homeostasis in Response to Low K+ Stress
Source: Preprints.org preprint supplement (doi:10.20944/preprints202410.1149.v1), 2024-10-15
Supplement: Supplementary file 1 [file supplementary]

Supplemental Table S1. Primers used in this study.

| Primers for quantitative RT-PCR (qRT-PCR) | |
| --- | --- |
| Primer Name | Sequence (5’ to 3’) |
| qActin2-F | GGAAGGATCTGTACGGTAAC |
| qActin2-R | GGACCTGCCTCATCATAC |
| qHDC1-F | GGGTGCGTCTCTCTGTCTTC |
| qHDC1-R | ATGATACATTACAAGCCAGGCCA |
| qPIN1-F | CCTCCGTTTCCTCGCCGCAG |
| qPIN1-R | TTAGCTCCACGGTACTCAAA |
| qPIN2-F | CCTCGCCGCACTCTTTCTTTGG |
| qPIN2-R | CCGTACATCGCCCTAAGCAATGG |
| qPIN3-F | GAGATCCGTATGTTAGTCCC |
| qPIN3-R | GGCGTCTTTTGGTCTCTCTG |
| qAUX1-F | GACGCACTTCTCGACCACTC |
| qAUX1-R | CCCAATCACTTTCTCCCACA |
| qCBL2-F | GCTCGTGCTCTCTCCGTCTTTC |
| qCBL2-R | GCCGCTGCTTGCTTTTGCTTTTG |
| qCBL3-F | CTGAGTCCGGCATGAACCTGTC |
| qCBL3-R | TTCCCAAATTGTCTCCTCTGCTAA |
| qCBL1-F | CGACATGGACTGCACGGGTTAC |
| qCBL1-R | TCGTGGCAATCTACTCGGTCTTA |
| qCBL9-F | AGCGCCAAGAGGTGAAGCAG |
| qCBL9-R | TCTCTTTCACGTCGCAATCTG |
| qAKT1-F | TGACGAATGTTCTGCTGGAG |
| qAKT1-R | TGCCATTGTTATCCGATTCA |
| qTPK1-F | CCGGTTATCTCAGCTTTCTACT |
| qTPK1-R | AAACTGAGCCAAACATATGCTG |
